# Supplementary material for: Dimensionality of luminescent coordination polymers of magnesium ions and 1,1′-ethynebenzene-3,3′,5,5′-tetracarboxylic acid modulated by structural inducing agents
Source: Royal Society of Chemistry journal article supplement (doi:10.1039/c8ra04875d), 2018-01-01
Supplement: c8ra04875d1.pdf [file c8ra04875d1.pdf]

## Electronic Supplementary Information (ESI)

### **Dimensionality of luminescent coordination polymers of magnesium ions and 1, 1'-ethynebenzene-3, 3', 5, 5'-tetracarboxylic acid modulated by structural inducing agents**

Zhu-Xi Yang,<sup>a</sup> Yin Qian,<sup>a</sup> Jing-Wei Yu,<sup>a</sup> Lu Zhai,<sup>\*a</sup> Wen-Wei Zhang,<sup>b</sup>  
Xiao-Ming Ren<sup>\*a,b,c</sup>

*<sup>a</sup>State Key Laboratory of Materials-Oriented Chemical Engineering and College of Chemistry & Molecular Engineering, Nanjing Tech University, Nanjing 210009, P. R. China*

*<sup>b</sup>State Key Laboratory of Coordination Chemistry, School of Chemistry and Chemical Engineering, Nanjing University, Nanjing 210023 P. R. China*

*<sup>c</sup>College of Materials Science & Engineering, Nanjing Tech University, Nanjing 210009, P. R. China*

Email: [zhailu@njtech.edu.cn](mailto:zhailu@njtech.edu.cn) (LZ); [xmren@njtech.edu.cn](mailto:xmren@njtech.edu.cn) (XMR)

## Contents

**Fig. S1** PXRD patterns of (a) **1** (b) **2** (c) **3** as-synthesized samples and simulated one based on the single-crystal structures and (d) TG plots of **1–3**, indicating that three CPs start to release the coordination solvents or lattice solvents at room temperature

**Fig. S2** Dihedral angle between two phenyl rings in (a) **1** (b) **2** (c) **3**

**Fig. S3** The coordination environment of (a) Mg1 and (b) Mg2 (c) trinuclear cluster as node being connected to six HEBTC<sup>3-</sup> ligands (d) packing diagram viewed along c-axis, which shows the stack of two-dimensional coordination layers, in **2** (all H atoms were omitted for clarity)

**Fig. S4** (a) Mg<sup>2+</sup>-binuclear unit and packing diagrams viewed along (b) b-axis (c) [101] direction in **3**

**Fig. S5** IR spectra of **1–3** recorded using KBr pellet

**Fig. S6** Photographs of single crystals of **1**

**Fig. S7** Photographs of single crystals of **2**

**Fig. S8** Photographs of single crystals of **3**

**Table S1:** Selected bond distances (Å) and angles (°) in **1–3**

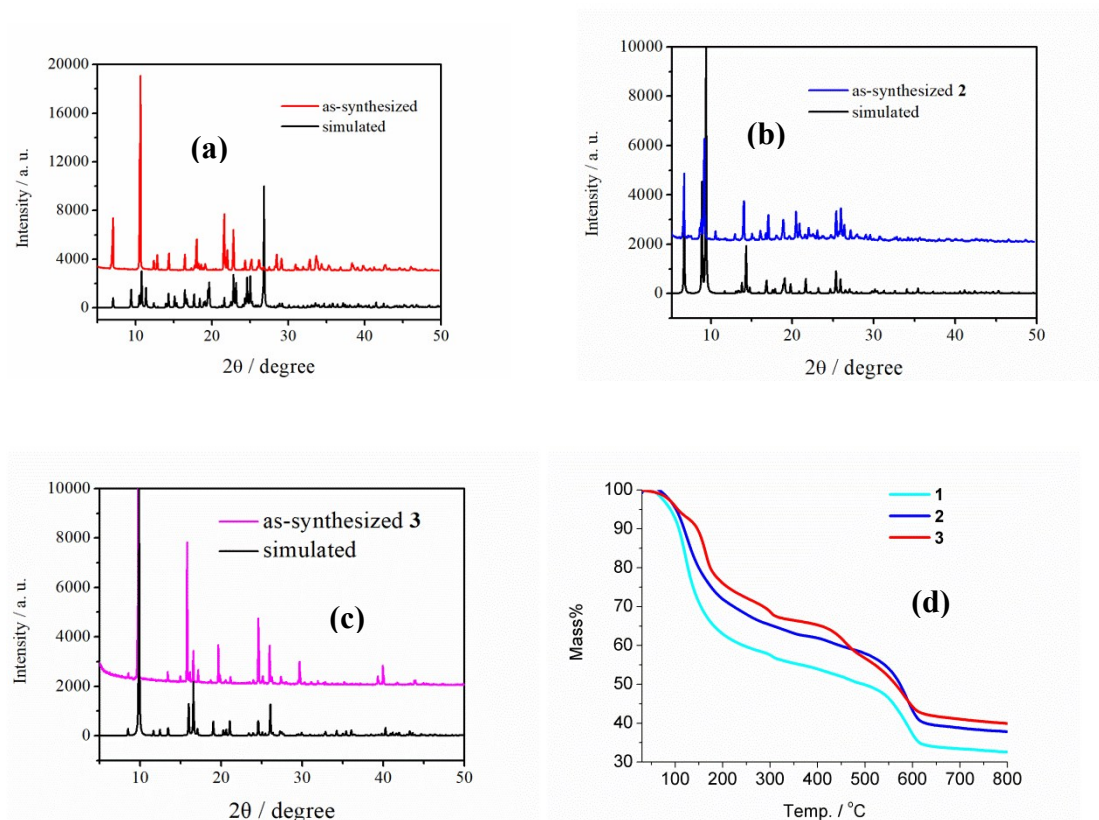

**Fig. S1** PXRD patterns of (a) **1** (b) **2** (c) **3** as-synthesized samples and simulated one based on the single-crystal structures and (d) TG plots of **1–3**, indicating that three CPs start to release the coordination solvents or lattice solvents at room temperature.

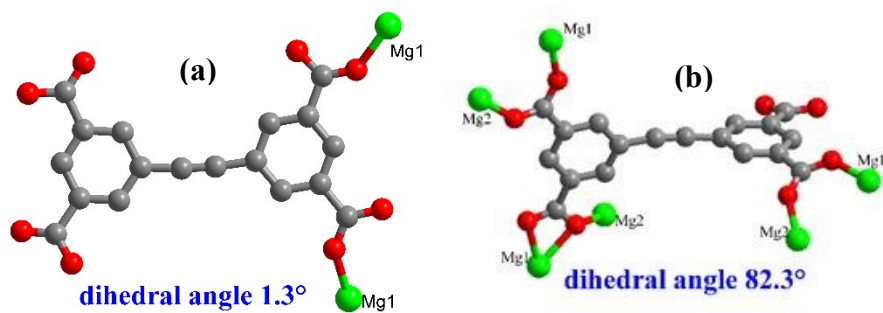

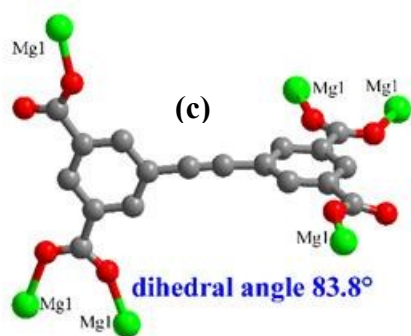

**Fig. S2** Dihedral angle between two phenyl rings in (a) **1** (b) **2** (c) **3**.

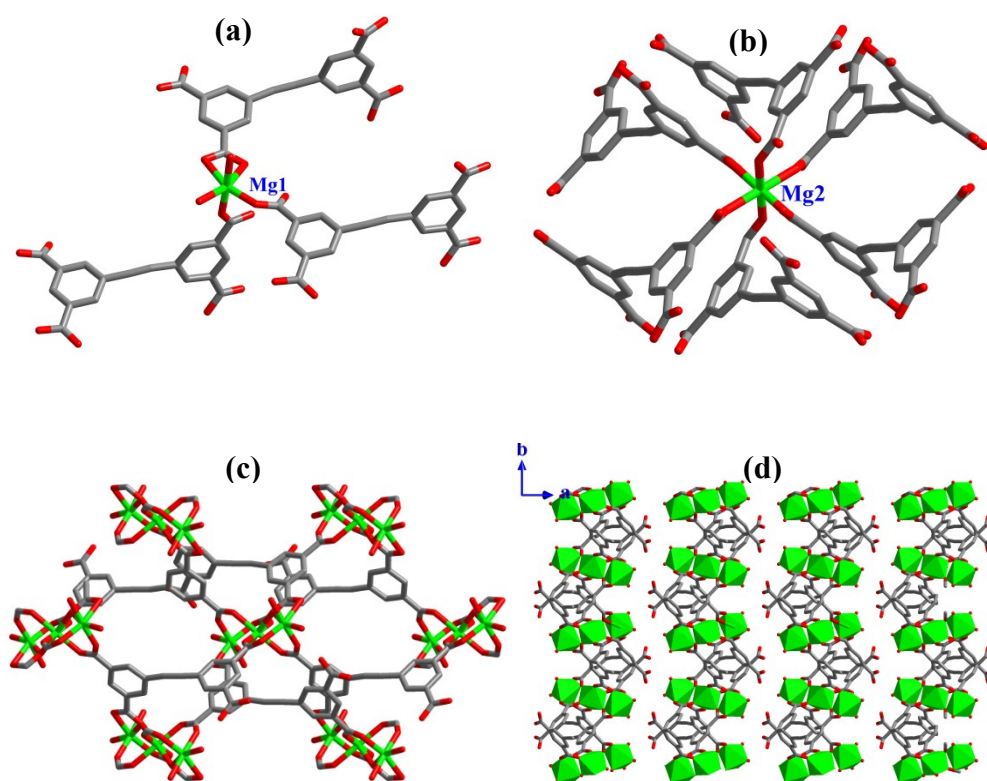

**Fig. S3** The coordination environment of (a) Mg1 and (b) Mg2 (c) trinuclear cluster as node being connected to six HEBTC<sup>3-</sup> ligands (d) packing diagram viewed along c-axis, which shows the stack of two-dimensional coordination layers, in **2** (all H atoms were omitted for clarity).

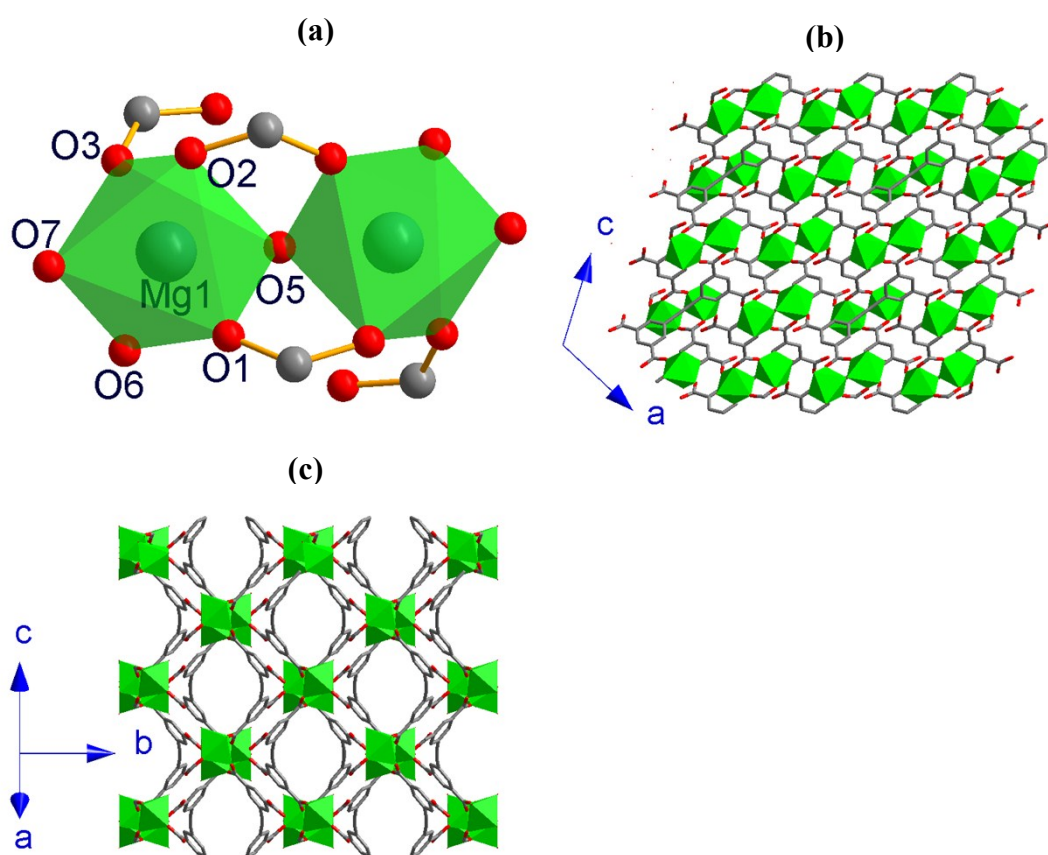

**Fig. S4** (a)  $Mg^{2+}$ -binuclear unit and packing diagrams viewed along (b) b-axis (c) [101] direction in **3**.

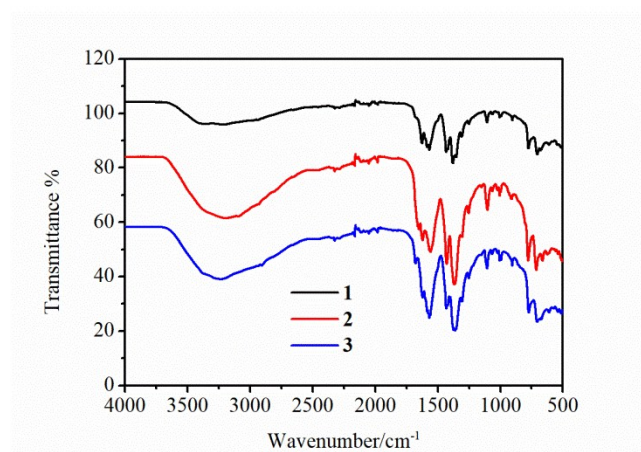

**Fig. S5** IR spectra of **1–3** recorded using KBr pellet.



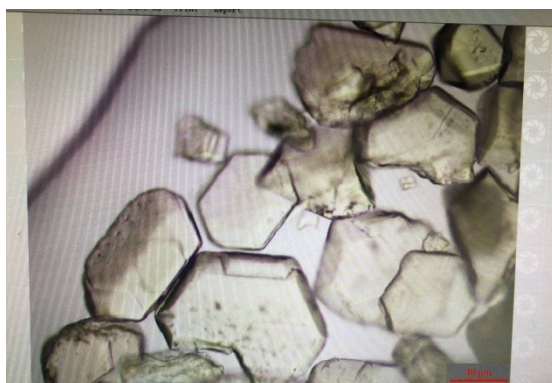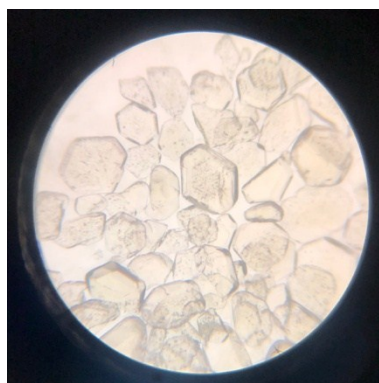

**Fig. S6** Photographs of single crystals of **1**.

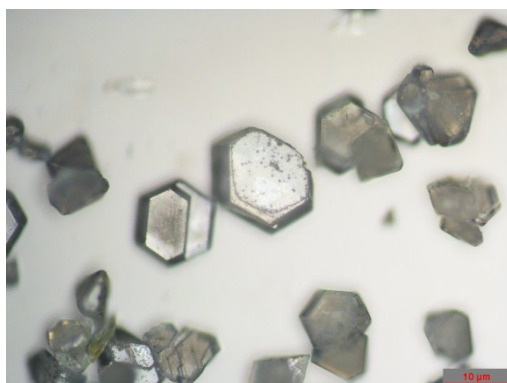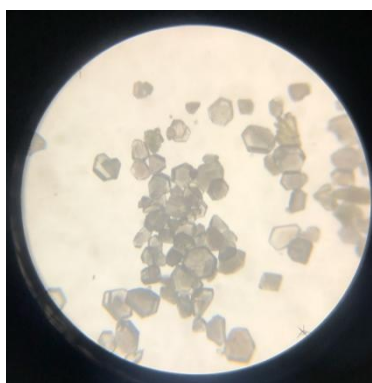

**Fig. S7** Photographs of single crystals of **2**.

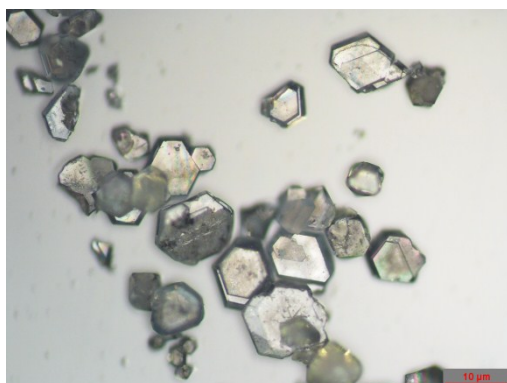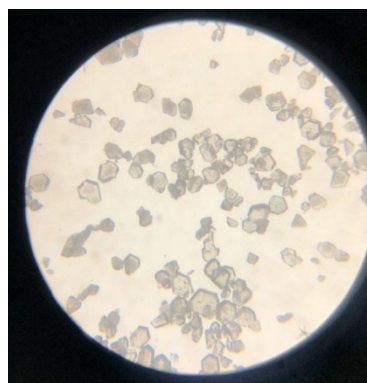

**Fig. S8** Photographs of single crystals of **3**.

**Table S1:** Selected bond distances (Å) and angles (°) in **1–3****CP 1**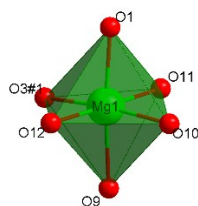**Bond lengths**

|         |          |          |          |         |          |
|---------|----------|----------|----------|---------|----------|
| Mg1–O1  | 2.006(3) | Mg1–O3#1 | 2.070(3) | Mg1–O9  | 2.081(4) |
| Mg1–O10 | 2.092(3) | Mg1–O11  | 2.064(4) | Mg1–O12 | 2.055(4) |

**Bond angles**

|              |            |              |            |             |            |
|--------------|------------|--------------|------------|-------------|------------|
| O12–Mg1–O11  | 179.21(17) | O12–Mg–O1    | 89.48(14)  | O11–Mg1–O1  | 89.74(14)  |
| O12–Mg1–O3#1 | 91.47(14)  | O11–Mg1–O3#1 | 88.47(14)  | O1–Mg1–O3#1 | 99.16(14)  |
| O12–Mg1–O9   | 90.34(14)  | O11–Mg1–O9   | 90.45(15)  | O1–Mg1–O9   | 172.88(15) |
| O3#1–Mg1–O9  | 87.97(15)  | O12–Mg1–O10  | 90.45(14)  | O11–Mg1–O10 | 89.69(14)  |
| O1–Mg1–O10   | 87.16(14)  | O3#1–Mg1–O10 | 173.40(15) | O9–Mg1–O10  | 85.72(15)  |

**CP 2**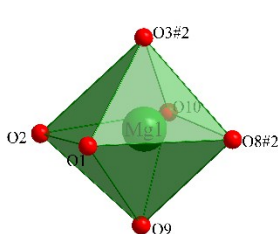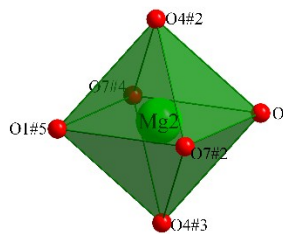**Bond lengths**

|        |          |        |          |          |          |
|--------|----------|--------|----------|----------|----------|
| Mg1–O1 | 2.153(3) | Mg1–O2 | 2.211(3) | Mg1–O3#2 | 1.965(3) |
|--------|----------|--------|----------|----------|----------|



|          |          |          |          |          |          |
|----------|----------|----------|----------|----------|----------|
| Mg1–O8#2 | 2.013(3) | Mg1–O9   | 2.068(4) | Mg1–O10  | 2.028(3) |
| Mg2–O1   | 2.144(2) | Mg2–O1#5 | 2.144(2) | Mg2–O4#2 | 2.139(2) |
| Mg2–O4#3 | 2.139(2) | Mg2–O7#2 | 2.028(3) | Mg2–O7#4 | 2.028(3) |

### Bond angles

|               |            |               |            |               |            |
|---------------|------------|---------------|------------|---------------|------------|
| O3#2–Mg1–O8#2 | 92.63(15)  | O3#2–Mg1–O10  | 90.92(13)  | O8#2–Mg1–O10  | 96.65(14)  |
| O3#2–Mg1–O9   | 177.45(16) | O8#2–Mg1–O9   | 89.47(17)  | O10–Mg1–O9    | 87.41(13)  |
| O3#2–Mg1–O1   | 90.47(12)  | O8#2–Mg1–O1   | 102.05(12) | O10–Mg1–O1    | 161.17(13) |
| O9–Mg1–O1     | 90.47(12)  | O3#2–Mg1–O2   | 102.05(12) | O8#2–Mg1–O2   | 161.17(13) |
| O10–Mg1–O2    | 101.14(12) | O9–Mg1–O2     | 85.46(16)  | O1–Mg1–O2     | 60.03(10)  |
| O7#4–Mg2–O7#2 | 180.00(19) | O7#4–Mg2–O4#3 | 92.93(10)  | O7#2–Mg2–O4#3 | 87.07(10)  |
| O7#4–Mg2–O4#2 | 87.07(10)  | O7#2–Mg2–O4#2 | 92.93(10)  | O4#3–Mg2–O4#2 | 180.00(18) |
| O7#4–Mg2–O1#5 | 87.28(10)  | O7#2–Mg2–O1#5 | 92.72(10)  | O4#3–Mg2–O1#5 | 89.95(9)   |
| O4#2–Mg2–O1#5 | 90.05(9)   | O7#4–Mg2–O1   | 92.72(10)  | O7#2–Mg2–O1   | 87.28(10)  |
| O4#3–Mg2–O1   | 90.05(9)   | O4#2–Mg2–O1   | 89.95(9)   | O1#5–Mg2–O1   | 180.0(3)   |

---

### CP 3

---

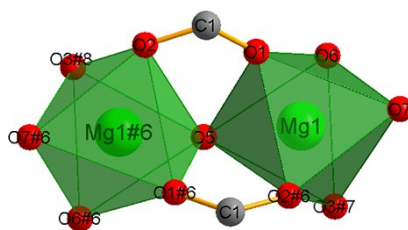


---

### Bond lengths

|        |            |          |            |          |            |
|--------|------------|----------|------------|----------|------------|
| Mg1–O1 | 1.9824(19) | Mg1–O2#6 | 2.1060(19) | Mg1–O3#7 | 2.0217(19) |
| Mg1–O5 | 2.1751(15) | Mg1–O6   | 2.094(2)   | Mg1–O7   | 2.0819(19) |

|           |            |           |            |           |            |
|-----------|------------|-----------|------------|-----------|------------|
| Mg#6-O1#6 | 1.9824(19) | Mg#6-O2   | 2.1060(19) | Mg#6-O3#8 | 2.0217(19) |
| Mg#6-O5   | 2.1751(15) | Mg#6-O6#6 | 2.094(2)   | Mg#6-O7#6 | 2.0819(19) |

### Bond angles

|                 |              |                 |             |                 |             |
|-----------------|--------------|-----------------|-------------|-----------------|-------------|
| O1-Mg1-O3#7     | 172.750(99)  | O1-Mg1-O7       | 95.928(88)  | O3#7-Mg1-O7     | 91.053(87)  |
| O1-Mg1-O6       | 90.464(104)  | O3#7-Mg1-O6     | 92.018(105) | O7-Mg1-O6       | 85.651(88)  |
| O1-Mg1-O2#6     | 91.207(90)   | O3#7-Mg1-O2#6   | 87.261(87)  | O7-Mg1-O2#6     | 86.481(79)  |
| O6-Mg1-O2#6     | 172.084(100) | O1-Mg1-O5       | 86.883(64)  | O3#7-Mg1-O5     | 86.501(65)  |
| O7-Mg1-O5       | 171.129(66)  | O6-Mg1-O5       | 85.915(73)  | O2#6-Mg1-O5     | 101.901(64) |
| O1#6-Mg1#6-O3#8 | 172.750(99)  | O1#6-Mg1#6-O7#6 | 95.928(88)  | O3#8-Mg1#6-O7#6 | 91.053(87)  |
| O1#6-Mg1#6-O6#6 | 90.464(104)  | O3#8-Mg1#6-O6#6 | 92.018(105) | O7#6-Mg1#6-O6#6 | 85.651(88)  |
| O1#6-Mg1#6-O2   | 91.207(90)   | O3#8-Mg1#6-O2   | 87.261(87)  | O7#6-Mg1#6-O2   | 86.481(79)  |
| O6#6-Mg1#6-O2   | 172.084(100) | O1#6-Mg1#6-O5   | 86.883(64)  | O3#8-Mg1#6-O5   | 86.501(65)  |
| O7#6-Mg1#6-O5   | 171.129(66)  | O6#6-Mg1#6-O5   | 85.915(73)  | O2-Mg1#6-O5     | 101.901(64) |

---

Symmetry transformations used to generate equivalent atoms for 1/2/3: #1=0.5-x, -0.5+y, 0.5-z; #2=-x, -0.5+y, 0.5-z; #3=x, -0.5-y, -0.5+z; #4=x, 0.5-y, 0.5+z; #5=-x, -y, -z; #6=1-x, y, 1.5-z; #7=-0.5+x, 0.5+y, z; #8=1.5-x, 0.5+y, 1.5-z.
